# Supplementary material for: A longitudinal outcome-wide assessment of the impact of happiness on flourishing: A 2-year cross-national analysis of 22 countries
Source: Research Square preprint supplement (doi:10.21203/rs.3.rs-7303632/v1), 2025-09-01
Supplement: Supplementary file 1 [file 101bd92995a08005bb8cd201.docx]

**Additional Supplementary Table: Longitudinal Happiness Studies**

| **Authors** | **Location** | **No.** | **Participants** | **Years** | **Waves, points** | **SWB variable / scale** | **SWB as?** | **Main other variables** | **Main finding** |
| --- | --- | --- | --- | --- | --- | --- | --- | --- | --- |
| (Abe, 2016) | USA | 79 | Adults | 2.5 | 2 | LOT-R; PWB scale | Outcome | Meaning; grit; personality; gratitude; emotion regulation | Happiness as assessed by a composite measure of positive emotionality showed weak associations with the measures of adaptive functioning, and was negatively correlated with optimism, as well as positively correlated with emotion suppression. By contrast, meaning-making as assessed by composite measures of cognitive processing and self-distancing was robustly positively correlated with almost all measures of adaptive functioning. Regression analyses revealed that the two measures of meaning and their interaction term accounted for 20–24% of the variance in predicting the outcome measures. This study revealed that there may be at times a trade-off between happiness and meaning-making as well as a reversal in their patterns of long-term outcomes. |
| (Akbulut, 2025) | Turkey | 234 | Young adults | 4 mo. | 2 | SHS; WEMWBS-SF | Mediator | Childhood experiences; suicide cognitions | Suicide cognitions and subjective happiness play a serial mediating role in the longitudinal relationship between positive childhood experiences and mental well-being |
| (Alfalah & Alganem, 2020) | Kuwait | 276 | Students (university) | 3 mo. | 2 | OHI | Outcome | Intervention: construal levels | When high construal level is used in situations and emotions, the perception became more abstract and coherent. The study posited that using two construal levels of people's perception concurrently (low/high) would result in a greater impact on the selected positive psychology factors compared with using one construal level and that the smallest impact would occur in a control group. The greatest impact was observed on happiness when applying both construal levels (high/low group), while the smallest impact was found in the control group. |
| (Arslan et al., 2023) | Belgium | 329 | Adolescents | 6 | 3 | SWLS, PANAS | Outcome | Personality | For each personality dimension, except benevolence, higher levels were associated with fewer burnout symptoms. Initial levels of all personality dimensions were related to more happiness. Shallower decreases in extraversion, emotional stability, and stronger increases in imagination were related to fewer burnout symptoms and more happiness. Results indicate the importance of studying personality development as a determinant of later well-being, above and beyond effects of initial levels. |
| (Blekesaune, 2018) | UK | 10,300 | Adults | 12 | 12 | LS (single item), GHQ | Outcome | Cohabitation or marriage | A longitudinal (fixed effects) analysis that controls for time-invariant variation in subjective well-being indicates that entering cohabitation is as beneficial for people’s happiness as entering marriage. Entering marriage is slightly more satisfying than cohabitation but only among previously never-married individuals. This is true for men and women and across age and cohorts. These findings indicate that cohabitation provides similar benefits to marriage with regard to happiness but not how previously never married individuals view their overall satisfaction with their lives. |
| (Boehm et al., 2011) | USA | 220 | Adults | 3 mo. | 3 | SWLS | Outcome | Intervention: happiness strategies | Multi-level analyses indicated that participants in the optimism and gratitude conditions reported enhanced life satisfaction relative to those in the control condition. However, Anglo Americans in the treatment conditions demonstrated larger increases in life satisfaction relative to Asian Americans, while both cultural groups in the control condition showed the least improvement. |
| (Boehnke & Wong, 2011) | Germany | 220 (1492) | Adolescents into adulthood | 21 | 7 | H (single item) | Outcome | Adolescent political activism | Activists are assumed to have lower (self-related) microworries (Hypothesis 1) and higher macroworries (concerned with larger entities; Hypothesis 2) than nonactivists at the onset of the study. Nonactivists who appraised the threat of nuclear war as high in 1985 are assumed to report worse mental health than their activist age mates 21 years later (Hypothesis 3). Activists are assumed to express relatively more macroworries than nonactivists in midadulthood (Hypothesis 4). All four hypotheses were confirmed |
| (Becker & Trautmann, 2022) | 20 European countries1 | 139,116 | Older adults | 13 | 7 | LS (single item); CASP-12 (quality of life) | Outcome | Age | Consistent with a U-shape around middle age, we find that happiness initially increases after the age of 50, but commonly stagnates afterwards and eventually reverts at high age. This pat tern is generally observed irrespective of the utilized happiness measure, control variables, estimation methods, and the consideration of selection effects due to mortality. |
| (Brzozowski & Coniglio, 2021) | Poland | 26,307 | Adults | 15 | 3 | H (single item) | Predictor | Migration intentions and actions | In terms of actual migration, however, the unhappiness push significantly affects the odds of international migration only for selected subgroups, such as women and employed individuals. For other individuals, the unhappiness-induced migration plans remain mostly unrealized. |
| (Ciupei et al., 2025) | Romania | 349 | Students | 1 mo. | 3 | OTH, PAL | Outcome | Happiness activities; orientations to happiness | Pleasure-enhancing activities partially mediated the pleasure orientation–positive emotions link, while engagement-enhancing activities fully mediated engagement orientation. Meaning-enhancing activities partially mediated the effect of meaning orientation on positive emotions, with a marginally significant indirect effect. Findings suggest that translating happiness orientations into concrete, activity-based behaviorus is important for sustaining positive emotions. Engagement orientation appears to rely fully on active participation in engagement-enhancing activities, while pleasure and meaning orientations benefit from such activities but may also be influenced by cognitive processes or other psychological mechanisms. |
| (Collins et al., 2023) | USA | 220 (1107) | Adults | 11 mo. | 4 | Implicit measure of emotions | Outcome | Fear of happiness | Greater self-reported fear of happiness was related to reduced implicit happiness. |
| (Costa et al., 2021) | Italy | 140 | Children (7-11) | 5 mo. | 2 | Social-Cognitive Measures | Outcome | Physical activity | Controlled motivation at T1 positively predicts negative affect in physical activity at T2. |
| (Creese et al., 2023) | UK | 12,450 | Adolescents | 6 | 2 | H with appearance (1 item) | Mediator | Self-esteem, BMI | Happiness with appearance and self-esteem, but not dieting or bullying, mediated the relationship between BMI age 11 and mental health age 17. Each increase in BMI z-score at 11 years was associated with 0.12 increase for boys and a 0.19 increase for girls in scores of unhappiness with appearance, and a 16% increase for boys and a 22% increase for girls in odds of low self-esteem at 14 years. In turn, for both boys and girls, being unhappy with appearance and low self-esteem at 14 years were associated with a greater likelihood of emotional and externalizing symptoms at 17 years. |
| (Crohan, 1992) | USA | 564 | Adults (282 couples) | 2 | 2 | NA | Outcome | Belief about marital conflict | The content of the beliefs that partners hold about marital conflict was more important to their marital happiness than spousal consensus. For example, those husbands and wives who both believe that conflicts should be avoided at Time 1 reported lower marital happiness in the first year of marriage as well as 2 years later than those spouses who both believe that conflicts should not be avoided. |
| (Datu et al., 2021) | Philippines | 396 | Students (high school) | 2 mo. | 3 | VHS, CMSW | Outcome | Valuing happiness | Results of cross-lagged panel structural equation modeling demonstrated that valuing happiness was positively associated with subsequent positive affect even after controlling for auto-regressor effects. T |
| (Dulin et al., 2012) | New Zealand | NA | Adults | NA | NA | NA | Outcome | Volunteering | The amount of volunteering per week was a unique predictor of the overall level of happiness. Moderation analyses indicated that ethnicity did not function as a moderator of the relationship between volunteering and happiness, but economic living standards (ELS) did. Those with low ELS evidenced a stronger relationship between volunteering and happiness than those with high ELS. Results also indicated that Māori and those with low ELS volunteered more frequently than non-Māori and those with high ELS. |
| (Erus et al., 2024) | Turkey | 308 (400) | Adults | 1 | 2 | SHS | Outcome | Adverse childhood experiences, family coherence | Family sense of coherence had a significant mediation role in the association between ACEs and subjective happiness. The findings show that low family coherence reduces the subjective happiness of people with ACEs. As a result, adults' happiness may be impeded by ACEs as well as dysfunctional family dynamics and cohesiveness. It is possible to deduce that a sense of family cohesion will be a healing factor for adults who have had ACEs, and that happiness will rise as family cohesion increases. |
| (Feng et al., 2024) | China | 5190 (17,057) | Adults | 7 | 4 | CES-D | Outcome | Leisure activities | Level of participation in leisure activities of Chinese middle-aged and older adults people has a significant predictive effect on their subjective happiness and that there is a significant correlation between the trajectory of changes in the level of participation in leisure activities and the trajectory of changes in subjective happiness |
| (Ford et al., 2022) | Thailand | 2204 | Adults (Muslim) | 2 | 2 | H (single item) | Outcome | Sociodemographic and village factors | Positive individual factors related to happiness were secular education, strictness of religious practice, and health. Positive household factors included relative household wealth and family support. Positive village factors included the village migration level and community support. Violence was associated with reduced happiness, especially for women. However, the adult residents of the southernmost provinces maintain a positive sense of well being. |
| (Fowler & Christakis, 2008) | USA | 4739 | Adults | 20 | 3 | CES-D | Predictor; outcome | Social networks; social ties | Longitudinal statistical models suggest that clusters of happiness result from the spread of happiness and not just a tendency for people to associate with similar individuals. |
| (Garcia & Moradi, 2012) | Sweden | 109 | Adolescents | 1 | 2 | PANAS, SWLS | Outcome | Temperament and character | Temperament (Harm Avoidance and Novelty Seeking) and character (Self-Directedness) predicted SWB at T1. However, only Self-Directedness predicted SWB at T2 and also small but significant changes in SWB at the end of the school year. |
| (Galambos et al., 2015) | Canada | 1557 [968 + 589] | Adults | 25 | 4 | H (single item) | Outcome | Age | Happiness increased into the 30s in both samples, with a slight downturn by age 43 in the high school sample. The rise in happiness after high school and university remained after controlling for important baseline covariates (gender, parents’ education, grades, self-esteem), time-varying covariates known to be associated with happiness (marital status, unemployment, self-rated physical health), and number of waves of participation. The upward trend in happiness runs counter to some previous cross-sectional research claiming a high point in happiness in the late teens, decreasing into midlife. As cross-sectional designs do not assess within-person change, longitudinal studies are necessary for drawing accurate conclusions about patterns of change in happiness across the life span. |
| (Gardner & Oswald, 2001) | UK | 9000 | Adults (receiving windfall) | 7 | 7 | GHQ-12 | Outcome | Receiving windfall | Those in the panel who receive windfalls -- by winning lottery money or receiving an inheritance -- have higher mental wellbeing in the following year. A windfall of 50,000 pounds (approximately 75,000 US dollars) is associated with a rise in wellbeing of between 0.1 and 0.3 standard deviations. Approximately one million pounds (1.5 million dollars), therefore, would be needed to move someone from close to the bottom of a happiness frequency distribution to close to the top. Whether these happiness gains wear off over time remains an open question. |
| (Gutiérrez-Cobo et al., 2021) | Spain | 88 | Adults | 4 mo. | 2 | PANAS, SF-36 health survey | Outcome | Pleasant activities | Optimal fit of the proposed model in which cognitive reappraisal was significantly related to engagement in more pleasant activities during the lockdown. In turn, these pleasant activities were related to more affective happiness during the lockdown (compared with pre-pandemic levels), and this affective happiness was associated with greater cognitive happiness. |
| (Hayashi et al., 2024) | Japan | 94 | Adults (employees) | 6 mo. | 2 | SWLS | Outcome | Texting | The data is used to construct a happiness estimation model and as sess individual happiness levels. Evaluation of the model performance using correlation co efficients shows variability in the correlation values among individuals. |
| (Headey et al., 2010) | Germany | 1500 | Adults | 15 | 15 | LS (single item) | Outcome | Religious practice | Individuals who become more religious over time record long term gains in life satisfaction, while those who become less religious record long term losses. This result holds net of the effects of personality traits, and also in fixed effects panel models. |
| (Holahan et al., 2008) | USA | 717 | Adults | 20 | 6 | H (single item) | Outcome | Beliefs about aging | The results showed a small decline in happiness over time. Higher age was associated with less happiness at baseline and with a greater decline in happiness. At the same time, the general level of happiness in this sample was moderately high, with a large majority of respondents relatively happy into later aging. Moreover, positive expectancies about aging, assessed at an average age of 61, predicted greater happiness at ages 70, 75, and 80. |
| (Hoppmann et al., 2011) | USA | 356 | Coupleshsi (188) | 35 | 7 | H (single item) | Outcome | Spouse H | Latent growth curve models revealed sizeable spousal similarities not only in levels of happiness but also in how happiness changed over time. These spousal interrelations were considerably larger in size than those found among random pairs of women and men from the same sample. Results are in line with life-span theories emphasizing an interactive minds perspective by showing that adult happiness waxes and wanes in close association with the respective spouse. |
| (Yen et al., 2025) | Taiwan | 1298 | Adults | 10 | 2 | H (NA) | Outcome | BMI, self-rated health | A slight increase in the BMI may be beneficial for the well-being of older adults, leading to a happier, healthier, and more satisfying later life. |
| (In, 2022) | South Korea | 2351 | Adolescents | 5 | 3 | H (NA) | Predictor, outcome | Self-esteem | Self-esteem and happiness, and self-esteem and school adjustment reciprocally predicted each other over time. The effects of self-esteem on happiness and school adjustment two years later were stronger than the reverse direction of effects. School adjustment and happiness were only indirectly interrelated through self-esteem over time. |
| (Iwata et al., 2024) | Japan | 758 | Adults (couples) | 3 | 3 | NA | Outcome | Spousal happiness | A group-based trajectory modeling analysis was conducted to identify psychological distress patterns and happiness over time, while estimating the effects of spouses’ psychological distress and happiness and their own job demands, control, and support as time-varying covariates. The two- or three-group trajectory model best fit husbands’ and wives’ psychological distress and happiness trajectories. Husbands’ trajectories of psychological distress and happiness were significantly influenced by wives’ happiness as well as their own job demands and/or support, whereas wives’ happiness and psychological distress were not. |
| (Jun & Jang, 2009) | South Korea | 5688 | 2,844 adults, 2,844 children | 3 | 2 | NA | Outcome | Schoolwork achievement, extra private education | Happiness that develops during childhood remains stable and constant, which indicates that prior happiness has a strong effect on future happiness. The individual factors affecting the children, which include schoolwork achievement and extra private education, were found to have a great influence on the development of happiness at all ages. |
| (I. Kim & Ahn, 2023) | South Korea | 2242 | Adolescents | 3 | 3 | Happiness Index Scale | Outcome | Exercise, smartphone dependency | Latent growth modeling results revealed a significant linear decrease in adolescents’ exercise time and subjective well-being each year, while smartphone dependency exhibited an increasing trend. Furthermore, the significance tests of indirect effects indicated that the mediating effect of the changing trend in smartphone dependency between the changing trends in exercise time and subjective happiness in adolescents was statistically significant. These findings suggest that as grade levels increase, reducing exercise time can lead to higher smartphone dependency among adolescents, ultimately resulting in decreased subjective well-being. |
| (K. W. Kim et al., 2024) | South Korea | 4452  (4794) | Parents and children | 3 | 3 | SHS | Outcome | Parental factors, child food intake, physical activity, and screen time | Maternal play engagement showed positive concurrent associations with child healthy food intake and physical activity and negative associations with screen time. Maternal parenting stress was negatively related to child healthy eating. There was one significant finding related to fathers’ role on children’s energy-related behaviors, happiness, and weight status: the positive association between parental happiness and boys’ unhealthy food intake. Child screen time was positively related to child weight status and negatively to child happiness at each age. Broader maternal parenting factors can serve as a protective factor for childhood happiness and weight status in 7-to-9-year-olds through being associated with a reduction in child screen time. |
| (Kwon & Lee, 2020) | South Korea | 225 | Adults | 2 mo. | 2 | SWLS; pleasure scale | Outcome | Travelling | Life satisfaction and affect decreased in a negative slope. However, life satisfaction and affect had risen 15 days before travel and lasted for about 1 month after travel. This means that some factors concerning travel prevent hedonic adaptation and make happiness last longer. To understand the cause of inhibition of hedonic adaptation, an additional analysis was performed using the latent growth model. Travel satisfaction had a significantly direct effect on the change rate of life satisfaction after travel, and expectation and serendipity had a significantly indirect effect on the change rate of life satisfaction after travel, mediated by travel satisfaction. |
| (LeBaron et al., 2014) | USA | NA | Adults | 15 | NA | NA | Outcome | Marital power processes | Both marital power processes and power outcomes significantly influenced concurrent marital happiness. Additionally, concurrent marital happiness influenced marital happiness 15 years later, suggesting an indirect relationship between concurrent marital power and subsequent marital happiness. No direct relationship was found between marital power and subsequent marital happiness. |
| (J. K. Lee & Cho, 2012) | South Korea | NA | Children (primary school | 5 | NA | NA | Outcome | Academic achievement, self-esteem, social attachment (various forms) | Self-esteem, parent attachment, and peer attachment were found to have cross-sectional influences on happiness. This means that self-esteem, parent attachment, and peer attachment are positively associated with happiness at the intercept. Also, self-esteem, parent attachment, teacher attachment, and community attachment were found to have longitudinal influences on happiness. This means that the higher levels of community attachment at the intercept is associated with slower the rate of decrease in happiness at the slope. In addition, faster rates of decrease in self-esteem, parent attachment, teacher attachment, and community attachment are associated with faster the rate of decrease in happiness. |
| (E. J. Lee & Doh, 2020) | South Korea | 1604 | Mothers and children | 3 | 2 | NA | Outcome | Mother’s happiness and parenting | First, the longitudinal transactional relationship was confirmed among mothers’ happiness, maternal warmth, and children’s happiness. Second, the longitudinal relationship between children’s happiness at T1 and mothers’ happiness at T3 was mediated by maternal warmth at T2. Finally, the longitudinal relationship between maternal warmth at T1 and mothers’ happiness at T3 was mediated by children’s happiness at T2. |
| (H. Lee & Singh, 2020b) | USA | 30,377 | Adults | 13 | 13 | H and LS (single item) | Predictor | Life expectancy, mortality | Adults with higher happiness and life satisfaction levels had significantly higher life expectancy and lower all-cause mortality risks than those with lower happiness and satisfaction levels. |
| (H. Lee & Singh, 2020a) | USA | 30,933 | Adults | 14 | 14 | H and LS (single item) | Predictor | Life expectancy, mortality | In Cox models with 14 years of mortality follow-up, cancer mortality risk was 78% higher (hazard ratio [HR]=1.78; 95% CI=1.42,2.23) in adults with little or no happiness, controlling for age, and 53% higher (HR=1.53; 95% CI=1.19,1.97) in adults with little/no happiness, controlling for sociodemographic, behavioral and health characteristics, when compared with adults reporting happiness most or all of the time. Age- adjusted cancer mortality risk increased by 41% (HR=1.41; 95% CI=1.21,1.77) in adults who were very dissatisfied with their life. Cancer mortality did not vary by life satisfaction after adjusting for all covariates. |
| (N. Li, 2016) | Australia | 7229 | Adults | 10 | 7 | H (single item) | Outcome | Age | OLS regressions based on cross-section data reflect the difference in average happiness across birth cohorts. In contrast, regressions controlling for individual fixed effects reflect the change in happiness over life cycle within individuals. For the first time in the literature, the co-existence of a cross-section U shape and a longitudinally declining pattern in the relationship between age and happiness is established. |
| (T. Y. Li et al., 2025) | Taiwan | 1,637 | Adults | 8 | 3 | NA | Predictor, outcome | Job-education match | Job-education match and happiness show autoregressive effects across the three waves, while job satisfaction only shows autoregressive effects in the latter two waves. The autoregressive effect of job-education match reflects the profound impact of the educational stage on career paths. The autoregressive effect of happiness may indicate that increasing age and stable living environments can increase the stability of happiness. |
| (Lin et al., 2022) | China | 906 | Students (university) | 1 | 2 | SWLS | Mediator, outcome | Social mobility beliefs, happiness beliefs | Autoregressive path analyses showed significant indirect effects of social mobility belief on life satisfaction, positive affect and meaning in life (but not negative affect) through eudaimonic motives (but not through hedonic motives). Social mobility beliefs at Time 1 predicted increased eudaimonic motives at Time 2, and eudemonic motives at Time 1 predicted increased well-being at Time 2, adjusting for outcomes assessed at Time 1. |
| (G. Li et al., 2023) | China | 539 | Adolescents | 3 | 5 | PWBS | Mediator | Parental support, academic achievement | The slope of parental academic support across the five measurements predicted the slope of students’ academic performance through the slope of student happiness. In addition, the slope of parental academic expectations moderated the effect of the slope of parental academic support on the slope of student happiness. Specifically, this positive effect was significant only when the slope of academic expectation is positive. |
| (L. Lu, 1999) | Taiwan | 105 (581) | Adults | 2.5 | 2 | OHI; LS (8 item domain satisfaction) | Outcome | Personality; social support | Longitudinal analysis indicated moderate stability of the subjective well-being (SWB) measures. More importantly, when both the baseline SWB levels and personality traits were statistically controlled, social support still predicted overall happiness, and positive life events predicted life satisfaction. Furthermore, there was a consistently strong bidirectional relationship between overall happiness and life satisfaction. |
| (H. Lu et al., 2020) | China | 16,253 | Adults | 4 | 3 | H (single item) | Outcome | Social trust | We find robust evidence that a positive, causal relationship between social trust and happiness. We also find significant heterogeneity in the impact across genders and places of residence. The happiness of males and urban residents is more likely to be affected by social trust, compared to the happiness of female and rural residents, respectively. We further show that the key mechanisms through which social trust affects happiness are changes in self-reported health, social ties, perceived fairness of the society and subjective socioeconomic status. |
| (Matthes et al., 2021) | Austria | 416 (731) | Adults | 1 | 2 | H (single item) | Outcome | Fear of Covid, self-disclosure | Fear of COVID-19 significantly predicted online self-disclosure and happiness over time, but not psychological well-being. Online self-disclosure, on the other hand, significantly predicted happiness, but neither fear of COVID-19 nor psychological well-being over time. Participants who engaged more strongly in online self-disclosure at T1 felt happier at T2, but they did not differ from less-disclosing participants concerning COVID-19 fears and psychological well-being at T2. Importantly, happiness and psychological well-being were significantly related over time. |
| (McNeil et al., 1986) | Canada | 408 | Older adults | 1.5 | 2 | MUNSH | Outcome | Age | For a large sample of the elderly, mean levels of subjective domain indicators of happiness (excluding subjective health), as well as happiness itself, did not change over the 18-month period of the study. Physically related objective domain indicators, on the other hand, did change during the same time period. |
| (Moza et al., 2019) | Romania | 101 | Students (university) | 1.5 | 3 | NA | Outcome | Self-esteem | Structural equation modeling analyses revealed that self-esteem is an antecedent of both happiness and dimensions of independent self-construal (i.e., consistency vs. variability and self-expression vs. harmony). In other words, one’s positive evaluation of self-worth precedes one’s self-perception as being a happy and independent person. |
| (Okur et al., 2025) | Turkey | 277 | Adults | 4 mo. | 2 | HSH | Outcome | Cognitive flexibility, family communication | Cognitive flexibility played a longitudinal mediating role in the relationship between family communication and happiness. |
| (Ortiz et al., 2021) | Brazil | 746 (1134) | Adolescents (12) | 2 | 2 | SHS | Outcome | Scale validation | Longitudinal validation of SHS. |
| (Oswald & Powdthavee, 2008) | UK | 2500 | Adults (with disability) | 7 | 7 | LS (single item) | Outcome | Disability | It provides longitudinal evidence that individuals who become disabled go on to exhibit recovery in mental wellbeing. Adaptation to severe disability, however, is shown to be incomplete. |
| (Pandya, 2017) | 15 countries2 | 5339 | Adolescents | NA | NA | NA | Outcome | Intervention: spirituality | A customized spiritual program was administered and post-treatment outcome variable scores of the experimental group were higher. Adolescents from relatively affluent nations, boys, Christians, and those who self-practiced scored higher post-test. |
| (Powdthavee & Vernoit, 2013) | UK | 3675 | Children | 4 | 4 | H (single item) | Outcome | Parental unemployment | Within-child estimates suggest that parental job loss when the child was relatively young has a positive influence on children's overall happiness. However, this positive association became either strongly negative or statistically insignificant as the child grew older. The estimated effects of parental job loss on children's happiness also appear to be unrelated to its effect on family income, parent–child interaction, and children's school experience. |
| (Prati & Mancini, 2023) | Italy | 2283 | Adults | 4 | 2 | H (single item) | Outcome | Demographic variables | Results revealed a small but significant increase in happiness from 2016 to 2021. In addition, living with a partner/spouse predicted higher happiness with a medium effect size, and total income loss predicted lower happiness with a small to medium effect size. Household size, living with at least one son/daughter, financial support, partial income loss, and job loss following the pandemic were unrelated to happiness. |
| (Proulx & Snyder-Rivas, 2013) | USA | 707 | Adults (married) | 20 | 6 | Marital H (11 items) | Outcome | Self-rated health | Latent differential models in AMOS 19 showed that unidirectional coupling existed for marital happiness and self-rated health only, such that higher levels of marital happiness predicted subsequent elevations in self-rated health over time. No evidence was found for bidirectional coupling between marital problems and self-rated health. |
| (Satici & Satici, 2022) | Turkey | 254 | Adults | 3 mo. | 2 | SHS | Outcome | Intervention: mindfulness | Results of cross-lagged panel model for a half-longitudinal design indicated mindfulness conferred strengthening for subjective happiness three months later via hope. |
| (Schoen et al., 2006) | Germany | 2,280 (3,346) | Adults | 7 | 2 | H (single item) | Predictor, outcome | Wives’ employment | Shifting into full-time employment is more likely for unhappily married than for happily married wives. Contrary to frequently invoked social and economic theories, wives’ full-time employment is associated with greater marital stability. Nonetheless, changes in wives’ employment have no significant effect on how marital quality changes between Times 1 and 2. |
| (Sheldon et al., 2010) | USA | 183 | Students (university) | 0.5 | 4 | SWLS; PANAS | Outcome | Intervention: autonomy, competence, and relatedness | Participants were randomly assigned to set goals either to improve their life circumstances (comparison condition) or to increase their feelings of autonomy, competence, or relatedness in life (treatment conditions). We hypothesized that sustained gains in happiness would be observed only in the three treatment conditions, and that even these gains would last only when there was continuing goal engagement. Results supported these predictions. |
| (Shi et al., 2024)l., 2024) | UK | 420 | Adults (employees) | 4 | 4 | Job satisfaction (3 items) | Mediator | Task performance | Building on Job Demands-Resources (JDR) theory, propose that happiness well-being positively mediates the relationship between perceived High-Performance Work Systems (HPWS) and individual task performance, while health well-being negatively mediates this focal relationship. Thus, happiness well-being fits the “mutual gains” perspective. In contrast, health well-being fits the “conflicting outcomes” perspective, and thus may be harmed by the HPWS to enhance the performance. Partial support for arguments |
| (Sobhonslidsuk et al., 2015) | Thailand | 38 | Adults (doctors) | 2 | 3 | WHOQOL-BREF | Outcome | Medical training | At baseline, most residents had moderate-to-very high confidence, expectations, and general health but also moderate-to-very high anxiety. The health-related quality of life score was highest in the social domain followed by the environmental, psychological, and physical domains. Their psychological, physical, social, and environmental scores significantly decreased after enrollment. Their happiness and general health scores were significantly reduced after enrollment. The training program duration was negatively associated with all domains. Residents with greater confidence had higher health-related quality of life scores in the physical, psychological, and environmental domains. |
| (Sujarwoto, 2021) | Indonesia | 23,776 | Adults | 7 | 2 | Adapted Health and Lifestyle Survey | Predictor | Socioeconomic variables | Happier Indonesians in 2007 earned more money, were more likely to be married, were less likely to be divorced or unemployed, and were in better health when the survey was conducted again seven years later. |
| (Sung & Choi, 2021) | South Korea | 1240 | Children | 3 | 2 | H (6 items) | Predictor, outcome | Executive dysfunction | Executive dysfunction and happiness were found to have reciprocal influences over the three time points. We also found that the cross-lagged effects of executive dysfunction and happiness were stronger than those of happiness on executive dysfunction. |
| (Toyama, 2021) | USA | 4963 | Adults | 2 | 2 | H | Outcome | Primary and secondary control | While only primary control predicted change in eudaimonia overall, the associations of primary and secondary control with changes in hedonia and eudaimonia differed by age. Particularly, in comparing these effects for younger and older individuals, primary control predicted increases in eudaimonia only for younger individuals, whereas secondary control predicted decreases in hedonia for younger individuals but predicted increases in eudaimonia for older individuals. Considering these findings, the importance of primary and secondary control for happiness may vary between adults of different ages, which is possibly due to their life priorities that may change with age. |
| (Unanue et al., 2021) | Chile | 288 (735) | Students (university) | 3 | 3 | SWLS, PANAS, PERMA, BPNS | Outcome | Organizational Citizenship Behaviours | Results that supported our main hypotheses: (1) OCBs are prospective positive predictors of hedonic happiness, eudaimonic happiness, and flourishing; (2) the three models of happiness also prospectively predict OCBs. Our findings suggest that OCBs foster a broad range of happiness facets, which in turn fosters back the emergence of more OCBs, leading to a virtuous circle of prosociality and well-being in the workplace. |
| (R. Wang et al., 2017) | China | 565 | Students (university) | 1 | 3 | SWLS | Outcome | Materialism | Using structural equation modeling, the cross-lagged model revealed that psychological needs satisfaction fully mediated the effects of materialism on SWB and depression. |
| (H. Wang et al., 2023) | Japan | 18,727 | Older adults | 3 | 2 | NA | Outcome | Eating behaviours | Eating with others was associated with improved happiness among older adults, with such an association being stronger among people living alone. |
| (Whillans et al., 2019) | Canada | 1000 | Students (university) | 1 | 2 | NA | Outcome | Valuing time or money | Respondents who valued time over money chose more intrinsically rewarding activities and were happier 1 year after graduation. These results remained significant controlling for baseline happiness and potential confounds, such as materialism and socioeconomic status, and when using alternative model specifications. These findings extend previous research by showing that the tendency to value time over money is predictive not only of daily consumer choices but also of major life decisions. |
| (Williams et al., 2015) | Australia | 247 | Adults (school staff) | 1.5 | 3 | Job satisfaction (The Job in General Scale) | Outcome | Psychological capital | Within and across time, both employee psychological capital and perception of organizational virtues independently related to greater work happiness. PsyCap and OV strongly correlated with work happiness, with a simplex structure i.e., variables closer in time were more strongly correlated, with correlation strength declining over time. Further, there was some evidence of a small of a synergistic effect. |
| (Wu et al., 2012) | Taiwan | 1099 | Adolescents | 4 | 3 | NA | Outcome | Mental health, education institute | The teenagers’ happiness growth on average decreased across three waves. (2) Both the depressive mood and positive institute had significant effects on the initial status of teenagers’ happiness. |
| (Yang & Moon, 2024) | South Korea | 324 | Adolescents | 3 | 2 | H (NA) | Outcome | Academic environment, personality | After a 3-year longitudinal observation, adolescents' subjective happiness decreased, with neglect and academic environment as key stimuli, depression and anxiety as cognitive responses, and peer attachments as role functions. These results emphasized the need for interventions to enhance emotional support, prevent neglect, manage academic stress, and improve peer relationships. Furthermore, approaches should prioritize comprehensive interventions and long-term follow-up to improve adolescent mental health. |
| (Ye et al., 2019) | Hong Kong | 214 | Students (university) | 6 mo. | 2 | NA | Outcome | Emotional intelligence, Social support | Sequential mediation analysis indicated that the trait emotional intelligence measured in Time 1 indirectly influenced the level of subjective happiness in Time 2 through a sequential pathway of social support provided for others in Time 1 and social support received from others in Time 2. |
| (Yu et al., 2023) | China | 2144 | Children (9-10) | 1 | 2 | H (adapted scale from OHI) | Outcome | Prosociality, peer preference, academic achievement | Prosocial behaviors, peer preference, and academic achievement predicted children’s self-reported happiness over a year, controlling for desire satisfaction. Bidirectional relations were found between peer-assessed happiness and prosocial behaviors, peer preference, and academic achievement. The results suggest that children’s happiness is linked to their social and academic functioning from middle childhood |
| (Yıldırım, 2021) | UK | 103 | Students (university) | 3 mo. | 2 | PANAS | Outcome | Happiness beliefs | Irrational happiness beliefs were significantly negatively related to positive affect only at Time 1. However, the research failed to provide evidence regarding the value of irrational happiness beliefs in predicting positive and negative affect over time. The results suggest that the impact of irrational happiness beliefs upon well-being may occur momentarily not over time |
| (Zerach et al., 2025) | Israel | 494 | Active duty combatants | 5 | 3 | NA | Outcome | Combat experiences PTSD, depression, social support | Above and beyond the contribution of preenlistment personal characteristics (T1) and combat experiences (T2), depressive and posttraumatic stress disorder symptoms (T2 and T3) negatively contributed to satisfaction with life and happiness (T3). Importantly, forgiveness and perceived social support (T2) predicted higher levels of satisfaction with life and happiness (T3). |

- Acronyms
  - BPNS: Basic Psychological Needs
  - CES-D: CHARLS Depression Scale
  - CMSW: Concise Measure of Subjective Well-Being
  - GHQ: General Health Questionnaire
  - OHI: Oxford Happiness Inventory
  - OTH: Orientations to Happiness Scale
  - MUNSH: Memorial University of Newfoundland Scale of Happiness
  - PAL: Pleasant Activities List
  - PANAS: Positive and Negative Affect Scale
  - PWBS: Psychological Wellbeing Scale
  - SHS: Subjective Happiness Scale
  - SWLS: Satisfaction with Life Scale
  - VHS: Valuing Happiness Scale
  - WEMWBS-SF: Warwick-Edinburgh Mental Well-Being Scale Short Form
  - WHOQOL-BREF: World Health Organization Quality of Life – Abbreviated

1 Austria, Belgium, Switzerland, Czech Rep., Germany, Denmark, Spain, Estonia, France, Greece, Croatia, Hungary, Israel, Italy, Luxembourg, Netherlands, Poland, Portugal, Slovenia, Sweden

2 NA

**References**

Abe, J. A. A. (2016). A longitudinal follow-up study of happiness and meaning-making. *The Journal of Positive Psychology*, *11*(5), 489–498. https://doi.org/10.1080/17439760.2015.1117129

Akbulut, Ö. F. (2025). Positive childhood experiences, suicide cognitions, subjective happiness, and mental well-being in young adults: A half-longitudinal serial mediation study. *Psychiatric Quarterly*. https://doi.org/10.1007/s11126-025-10162-6

Alfalah, A. A., & Alganem, S. A. (2020). The impact of construal level on happiness, hope, optimism, life satisfaction, and love of life: A longitudinal and experimental study. *Australian Journal of Psychology*, *72*(4), 359–367. https://doi.org/10.1111/ajpy.12297

Arslan, İ. B., Lucassen, N., de Haan, A. D., Jongerling, J., Bakker, A. B., & Prinzie, P. (2023). Adolescent personality development as a longitudinal marker for burnout and happiness in emerging adulthood. *International Journal of Behavioral Development*, *47*(3), 199–209. https://doi.org/10.1177/01650254231152422

Becker, C. K., & Trautmann, S. T. (2022). Does happiness increase in old age? Longitudinal evidence from 20 European countries. *Journal of Happiness Studies*, *23*(7), 3625–3654. https://doi.org/10.1007/s10902-022-00569-4

Blekesaune, M. (2018). Is cohabitation as good as marriage for people’s subjective well-being? Longitudinal evidence on happiness and life satisfaction in the British household survey. *Journal of Happiness Studies*, *12*(27), 505–520. https://doi.org/10.1007/s10902-016-9834-x

Boehm, J. K., Lyubomirsky, S., & Sheldon, K. M. (2011). A longitudinal experimental study comparing the effectiveness of happiness-enhancing strategies in Anglo Americans and Asian Americans. *Cognition & Emotion*, *25*(7), 1263–1272. https://doi.org/10.1080/02699931.2010.541227

Boehnke, K., & Wong, B. (2011). Adolescent political activism and long-term happiness: A 21-year longitudinal study on the development of micro- and macrosocial worries. *Personality and Social Psychology Bulletin*, *37*(3), 435–447. https://doi.org/10.1177/0146167210397553

Brzozowski, J., & Coniglio, N. (2021). International migration and the (un)happiness push: Evidence from Polish longitudinal data. *International Migration Review*, *55*(4), 1089–1120. https://doi.org/10.1177/01979183211004835

Collins, A. C., Jordan, D. G., Bartoszek, G., Kilgore, J., Lass, A. N. S., & Winer, E. S. (2023). Longitudinal and experimental investigations of implicit happiness and explicit fear of happiness. *Cognition and Emotion*, *37*(5), 973–989. https://doi.org/10.1080/02699931.2023.2223907

Costa, S., Bianco, A., Polizzi, V., & Alesi, M. (2021). Happiness in physical activity: A longitudinal examination of children motivation and negative affect in physical activity. *Journal of Happiness Studies*, *22*(4), 1643–1655. https://doi.org/10.1007/s10902-020-00289-7

Creese, H., Saxena, S., Nicholls, D., Pascual Sanchez, A., & Hargreaves, D. (2023). The role of dieting, happiness with appearance, self-esteem, and bullying in the relationship between mental health and body-mass index among UK adolescents: a longitudinal analysis of the Millennium Cohort Study. *EClinicalMedicine*, *60*, 101992. https://doi.org/10.1016/j.eclinm.2023.101992

Crohan, S. E. (1992). Marital happiness and spousal consensus on beliefs about marital conflict: A longitudinal investigation. *Journal of Social and Personal Relationships*, *9*(1), 89–102. https://doi.org/10.1177/0265407592091005

Datu, J. A. D., Bernardo, A. B. I., & Valdez, J. P. M. (2021). The emotional rewards of valuing happiness: a longitudinal study among Filipino adolescents. *Child Indicators Research*, *14*(5), 1769–1779. https://doi.org/10.1007/s12187-021-09820-5

Dulin, P. L., Gavala, J., Stephens, C., Kostick, M., & McDonald, J. (2012). Volunteering predicts happiness among older Māori and non-Māori in the New Zealand health, work, and retirement longitudinal study. *Aging & Mental Health*, *16*(5), 617–624. https://doi.org/10.1080/13607863.2011.641518

Erus, S. M., Uygun, E. G., Deniz, M. E., & Satıcı, S. A. (2024). Adverse childhood experiences and subjective happiness: Half-longitudinal mediation role of family sense of coherence. *Personality and Individual Differences*, *230*, 112810. https://doi.org/10.1016/j.paid.2024.112810

Feng, C., Shi, Z., Tian, Y., Ma, C., & Sun, Q. (2024). Longitudinal associations between leisure activities and subjective happiness among middle-aged and older adults people in China: national cohort study. *Frontiers in Public Health*, *12*. https://doi.org/10.3389/fpubh.2024.1441703

Ford, K., Jampaklay, A., & Chamratrithirong, A. (2022). A multilevel longitudinal study of individual, household and village factors associated with happiness among adults in the southernmost provinces of Thailand. *Applied Research in Quality of Life*, *17*(3), 1459–1476. https://doi.org/10.1007/s11482-021-09973-z

Fowler, J. H., & Christakis, N. A. (2008). Dynamic spread of happiness in a large social network: longitudinal analysis over 20 years in the Framingham Heart Study. *BMJ*, *337*(dec04 2), a2338–a2338. https://doi.org/10.1136/bmj.a2338

Galambos, N. L., Fang, S., Krahn, H. J., Johnson, M. D., & Lachman, M. E. (2015). Up, not down: The age curve in happiness from early adulthood to midlife in two longitudinal studies. *Developmental Psychology*, *51*(11), 1664–1671.

Garcia, D., & Moradi, S. (2012). Adolescents’ temperament and character: A longitudinal study on happiness. *Journal of Happiness Studies*, *13*(5), 931–946. https://doi.org/10.1007/s10902-011-9300-8

Gardner, J., & Oswald, A. (2001). *Does money buy happiness? A longitudinal study using data on windfalls*. Mimeo. Warwick University.

Gutiérrez-Cobo, M. J., Megías-Robles, A., Gómez-Leal, R., Cabello, R., & Fernández-Berrocal, P. (2021). Is it possible to be happy during the COVID-19 lockdown? A longitudinal study of the role of emotional regulation strategies and pleasant activities in happiness. *International Journal of Environmental Research and Public Health*, *18*(6), 3211. https://doi.org/10.3390/ijerph18063211

Hayashi, J., Ito, K., Manabe, M., Watanabe, Y., Nakayama, M., Uchida, Y., Wakamiya, S., & Aramaki, E. (2024). Estimation of happiness changes through longitudinal analysis of employees’ texts. *Proceedings of the 14th Workshop on Computational Approaches to Subjectivity, Sentiment, & Social Media Analysis*, 294–304. https://doi.org/10.18653/v1/2024.wassa-1.24

Headey, B., Schupp, J., Tucci, I., & Wagner, G. G. (2010). Authentic happiness theory supported by impact of religion on life satisfaction: A longitudinal analysis with data for Germany. *The Journal of Positive Psychology*, *5*(1), 73–82. https://doi.org/10.1080/17439760903435232

Holahan, C. K., Holahan, C. J., Velasquez, K. E., & North, R. J. (2008). Longitudinal change in happiness during aging: The predictive role of positive expectancies. *The International Journal of Aging and Human Development*, *66*(3), 229–241. https://doi.org/10.2190/AG.66.3.d

Hoppmann, C. A., Gerstorf, D., Willis, S. L., & Schaie, K. W. (2011). Spousal interrelations in happiness in the Seattle Longitudinal Study: Considerable similarities in levels and change over time. *Developmental Psychology*, *47*(1), 1–8. https://doi.org/10.1037/a0020788

In, H. (2022). Longitudinal and reciprocal relationships between self-esteem, school adjustment, and happiness in Korean secondary school students. *School Psychology International*, *43*(2), 135–155. https://doi.org/10.1177/01430343211072426

Iwata, N., Shimazu, A., Fujiwara, T., Shimada, K., Tokita, M., Watai, I., & Kawakami, N. (2024). The husband’s mental health is affected by the wife’s happiness, but not vice versa: a longitudinal observation. *Industrial Health*, *62*(6), 2024–0118. https://doi.org/10.2486/indhealth.2024-0118

Jun, M. K., & Jang, J. S. (2009). A longitudinal study of the development of happiness during childhood. *Journal of the Korean Home Economics Association*, *47*(3), 103-118.

Kim, I., & Ahn, H. (2023). The longitudinal mediating effect of smartphone dependency on the relationship between exercise time and subjective happiness in adolescents. *Healthcare*, *11*(22), 2997. https://doi.org/10.3390/healthcare11222997

Kim, K. W., Wallander, J. L., & Kim, B. (2024). Associations of broader parental factors with children’s happiness and weight status through child food intake, physical activity, and screen time: A longitudinal modeling analysis of South Korean families. *International Journal of Environmental Research and Public Health*, *21*(2), 176. https://doi.org/10.3390/ijerph21020176

Kwon, J., & Lee, H. (2020). Why travel prolongs happiness: Longitudinal analysis using a latent growth model. *Tourism Management*, *76*, 103944. https://doi.org/10.1016/j.tourman.2019.06.019

LeBaron, C. D. L., Miller, R. B., & Yorgason, J. B. (2014). A longitudinal examination of women’s perceptions of marital power and marital happiness in midlife marriages. *Journal of Couple & Relationship Therapy*, *13*(2), 93–113. https://doi.org/10.1080/15332691.2013.852492

Lee, E. J., & Doh, H.-S. (2020). Longitudinal study on transactional and mediational relationships between mothers’ happiness, parenting behaviors, and children’s happiness: Focus on the transition from kindergarten to elementary school. *Korean Journal of Child Studies*, *41*(4), 91–104. https://doi.org/10.5723/kjcs.2020.41.4.91

Lee, H., & Singh, G. K. (2020a). Association of happiness and life satisfaction with cancer mortality in the United States: A longitudinal analysis. *International Journal of Translational Medical Research and Public Health*, *4*, 1. https://doi.org/10.21106/ijtmrph.206

Lee, H., & Singh, G. K. (2020b). Inequalities in life expectancy and all-cause mortality in the United States by Levels of Happiness and Life Satisfaction: A longitudinal study. *International Journal of Maternal and Child Health and AIDS (IJMA)*, *9*(3), 305–315. https://doi.org/10.21106/ijma.392

Lee, J. K., & Cho, H. C. (2012). A longitudinal study of factors associated with happiness in primary school children. *Journal of the Korean Society of Child Welfare*, *40*, 41–71.

Li, G., Li, B., Wang, L., Liu, C., & Lu, L. (2023). A longitudinal study on the impact of parental academic support and expectations on students’ academic achievement: the mediating role of happiness. *European Journal of Psychology of Education*, *38*(2), 801–818. https://doi.org/10.1007/s10212-022-00608-x

Li, N. (2016). Multidimensionality of longitudinal data: Unlocking the age-happiness puzzle. *Social Indicators Research*, *128*(1), 305–320. https://doi.org/10.1007/s11205-015-1032-4

Li, T. Y., Chiou, H. J., & Su, Y. F. (2025). Longitudinal relationships among educational tracking, job-education match, job satisfaction, and happiness of Taiwan youth. *Bulletin of Educational Psychology*, *56*(3), 599–630.

Lin, L., Hua, L., & Li, J. (2022). Seeking pleasure or growth? The mediating role of happiness motives in the longitudinal relationship between social mobility beliefs and well-being in college students. *Personality and Individual Differences*, *184*, 111170. https://doi.org/10.1016/j.paid.2021.111170

Lu, H., Tong, P., & Zhu, R. (2020). Longitudinal evidence on social trust and happiness in China: Causal effects and mechanisms. *Journal of Happiness Studies*, *21*(5), 1841–1858. https://doi.org/10.1007/s10902-019-00159-x

Lu, L. (1999). Personal or environmental causes of happiness: A longitudinal analysis. *The Journal of Social Psychology*, *139*(1), 79–90. https://doi.org/10.1080/00224549909598363

Matthes, J., Koban, K., Neureiter, A., & Stevic, A. (2021). Longitudinal relationships among fear of COVID-19, smartphone online self-disclosure, happiness, and psychological well-being: survey study. *Journal of Medical Internet Research*, *23*(9), e28700. https://doi.org/10.2196/28700

McNeil, J. K., Stones, M. J., & Kozma, A. (1986). Longitudinal variation in domain indicators of happiness. *Social Indicators Research*, *18*(1), 119–124. https://doi.org/10.1007/BF00302535

Moza, D., Maricuțoiu, L., & Gavreliuc, A. (2019). Cross-lagged relationships between self-esteem, self-construal, and happiness in a three-wave longitudinal study. *Journal of Individual Differences*, *40*(3), 177–185. https://doi.org/10.1027/1614-0001/a000290

Okur, S., Ümmet, D., Satıcı, S. A., & Kütük, H. (2025). Relations among family communication, cognitive flexibility, and happiness in Turkish adults: a longitudinal mediation model. *Current Psychology*, *44*(3), 1467–1477. https://doi.org/10.1007/s12144-024-07224-6

Ortiz, F. R., Paiva, S. M., Pordeus, I. A., & Ardenghi, T. M. (2021). Psychometric properties and longitudinal measurement invariance of the Brazilian version of the subjective happiness scale in adolescents. *Journal of Clinical and Translational Research*, *7*(2), 234–240.

Oswald, A. J., & Powdthavee, N. (2008). Does happiness adapt? A longitudinal study of disability with implications for economists and judges. *Journal of Public Economics*, *92*(5–6), 1061–1077. https://doi.org/10.1016/j.jpubeco.2008.01.002

Pandya, S. P. (2017). Spirituality, happiness, and psychological well-being in 13- to 15-year olds: A cross-country longitudinal RCT study. *Journal of Pastoral Care & Counseling: Advancing Theory and Professional Practice through Scholarly and Reflective Publications*, *71*(1), 12–26. https://doi.org/10.1177/1542305016687581

Powdthavee, N., & Vernoit, J. (2013). Parental unemployment and children’s happiness: A longitudinal study of young people’s well-being in unemployed households. *Labour Economics*, *24*, 253–263. https://doi.org/10.1016/j.labeco.2013.09.008

Prati, G., & Mancini, A. D. (2023). Happiness before and during the COVID-19 pandemic in Italy: A population-based longitudinal study. *International Journal of Disaster Risk Reduction*, *91*, 103711. https://doi.org/10.1016/j.ijdrr.2023.103711

Proulx, C. M., & Snyder-Rivas, L. A. (2013). The longitudinal associations between marital happiness, problems, and self-rated health. *Journal of Family Psychology*, *27*(2), 194–202. https://doi.org/10.1037/a0031877

Satici, B., & Satici, S. A. (2022). Mindfulness and subjective happiness during the pandemic: Longitudinal mediation effect of hope. *Personality and Individual Differences*, *197*, 111781. https://doi.org/10.1016/j.paid.2022.111781

Schoen, R., Rogers, S. J., & Amato, P. R. (2006). Wives’ employment and spouses’ marital happiness. *Journal of Family Issues*, *27*(4), 506–528. https://doi.org/10.1177/0192513X05283983

Sheldon, K. M., Abad, N., Ferguson, Y., Gunz, A., Houser-Marko, L., Nichols, C. P., & Lyubomirsky, S. (2010). Persistent pursuit of need-satisfying goals leads to increased happiness: A 6-month experimental longitudinal study. *Motivation and Emotion*, *34*(1), 39–48. https://doi.org/10.1007/s11031-009-9153-1

Shi, L., Van Veldhoven, M., Kooij, D., Van De Voorde, K., & Karanika-Murray, M. (2024). High-performance work systems and individual performance: a longitudinal study of the differential roles of happiness and health well-being. *Frontiers in Psychology*, *14*. https://doi.org/10.3389/fpsyg.2023.1261564

Sobhonslidsuk, A., Thakkinstian, A., & Satitpornkul, P. (2015). Health-related quality of life and happiness within an internal medicine residency training program: a longitudinal follow-up study. *Journal of Educational Evaluation for Health Professions*, *12*, 3. https://doi.org/10.3352/jeehp.2015.12.3

Sujarwoto, S. (2021). Does happiness Pays? A longitudinal family life survey. *Applied Research in Quality of Life*, *16*(2), 679–701. https://doi.org/10.1007/s11482-019-09798-x

Sung, Y., & Choi, E. (2021). The reciprocal longitudinal relationship between executive dysfunction and happiness in Korean children. *International Journal of Environmental Research and Public Health*, *18*(15), 7764. https://doi.org/10.3390/ijerph18157764

Toyama, M. (2021). Longitudinal and age-related implications of primary and secondary control for happiness. *Innovation in Aging*, *5*(Supplement_1), 252–252. https://doi.org/10.1093/geroni/igab046.977

Unanue, W., Barros, E., & Gómez, M. (2021). The longitudinal link between organizational citizenship behaviors and three different models of happiness. *International Journal of Environmental Research and Public Health*, *18*(12), 6387. https://doi.org/10.3390/ijerph18126387

Wang, H., Tsuji, T., Ide, K., Nakagomi, A., Ling, L., & Kondo, K. (2023). Does eating with others promote happiness among older adults living alone? A 3‐year longitudinal study of the Japan gerontological evaluation study. *International Journal of Geriatric Psychiatry*, *38*(12). https://doi.org/10.1002/gps.6033

Wang, R., Liu, H., Jiang, J., & Song, Y. (2017). Will materialism lead to happiness? A longitudinal analysis of the mediating role of psychological needs satisfaction. *Personality and Individual Differences*, *105*, 312–317. https://doi.org/10.1016/j.paid.2016.10.014

Whillans, A., Macchia, L., & Dunn, E. (2019). Valuing time over money predicts happiness after a major life transition: A preregistered longitudinal study of graduating students. *Science Advances*, *5*(9). https://doi.org/10.1126/sciadv.aax2615

Williams, P., Kern, M. L., & Waters, L. (2015). A longitudinal examination of the association between psychological capital, perception of organizational virtues and work happiness in school staff. *Psychology of Well-Being*, *5*(1), 5. https://doi.org/10.1186/s13612-015-0032-0

Wu, P.-H., Luh, W.-M., & Lai, Y.-C. (2012). A longitudinal study of teenagers’ development of happiness in Taiwan: An analysis of hierarchical linear growth model. Chinese Journal of Guidance and Counseling. *Chinese Journal of Guidance and Counseling*, *34*, 1–18.

Yang, J.-E., & Moon, S. (2024). Predictors of adolescents’ subjective happiness based on Roy’s Adaptation Model: A longitudinal study. *The Open Public Health Journal*, *17*(1). https://doi.org/10.2174/0118749445352096241122113615

Ye, J., Yeung, D. Y., Liu, E. S. C., & Rochelle, T. L. (2019). Sequential mediating effects of provided and received social support on trait emotional intelligence and subjective happiness: A longitudinal examination in Hong Kong Chinese university students. *International Journal of Psychology*, *54*(4), 478–486. https://doi.org/10.1002/ijop.12484

Yen, H.-Y., Lin, G.-H., & Huang, H.-Y. (2025). Increased body mass index may have more happiness, life satisfaction, and self-rated health in the aging process: A 10-year longitudinal study. *Geriatric Nursing*, *64*, 103373. https://doi.org/10.1016/j.gerinurse.2025.05.012

Yıldırım, M. (2021). Irrational happiness beliefs and subjective well-being of undergraduate students: A longitudinal study. *Journal of Positive School Psychology*, *5*(1), 65–72. https://doi.org/10.47602/jpsp.v5i1.258

Yu, Y., Chen, X., Li, D., Liu, J., & Yang, F. (2023). Growing up happy: Longitudinal relations between children’s happiness and their social and academic functioning. *The Journal of Positive Psychology*, *18*(4), 531–546. https://doi.org/10.1080/17439760.2022.2093783

Zerach, G., Levinstein, Y., & Levi-Belz, Y. (2025). Longitudinal predictors of satisfaction with life and happiness among recently discharged combat veterans. *Traumatology*. https://doi.org/10.1037/trm0000586
